# Supplementary material for: Development of a Cell-Based SARS-CoV-2 Pseudovirus Neutralization Assay Using Imaging and Flow Cytometry Analysis
Source: MDPI journal article supplement (doi:10.3390/ijms241512332), 2023-08-02
Supplement: s1 [file s1]

Supplemental Table S1. Characteristics of Serum Samples Collected for Study.

| Sample Type       | Sample Number | Year Collected |
|-------------------|---------------|----------------|
| Natural Infection | 35            | 2020           |
| Negative          | 28            | Pre-2019       |
| Vaccination       | 15            | 2021           |
